# Supplementary material
Source: publisher figshare collection journal article supplement (https://frontiersin.figshare.com/ndownloader/files/18812492)
Supplement: Supplementary file 1 [file 18812492]

## Sheet: Sheet1
Supplemental Table 3: Confusion matrixes comparing manual and predicted classification of call types for the test set of Eptesicus fuscus echolocation and social calls. Call type abbreviations: Ec: Echolocation; Co: Complex; Ds: Downsweep; IU: Inverted-U-Shaped; Os: Oscillating; US: U-Shaped; Up: Upsweep. Classifications based on Discriminant Function Analysis of a training set of 357 calls. Call…
		Manual Classification
		Ec	Co	Ds	IU	Os	US	Up
Predicted Classification	Ec	15	0	0	0	0	0	0
	Co	0	67	0	0	0	0	0
	Ds	3	2	14	0	2	3	0
	IU	0	0	3	14	0	0	2
	Os	0	0	0	1	1	0	0
	US	0	0	0	0	0	9	4
	Up	0	0	0	0	1	2	32
